# Supplementary material for: The Future of Earth Observation in Hydrology
Source: Copernicus journal article supplement (doi:10.5194/hess-2017-54), 2017-02-09

Geosynchronous  
Meteorological Satellites

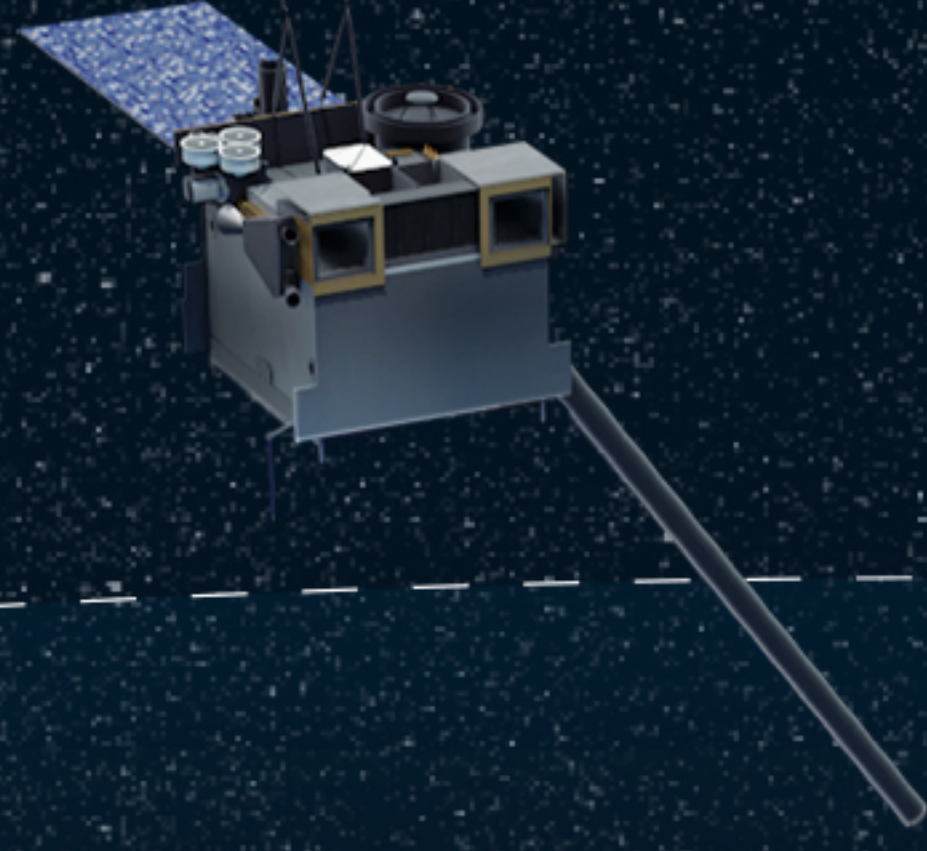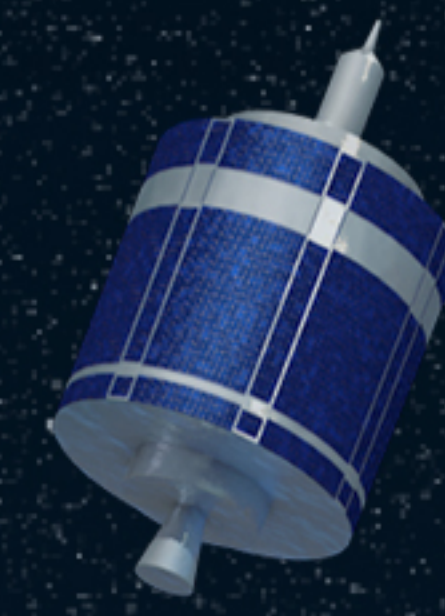

36000 km

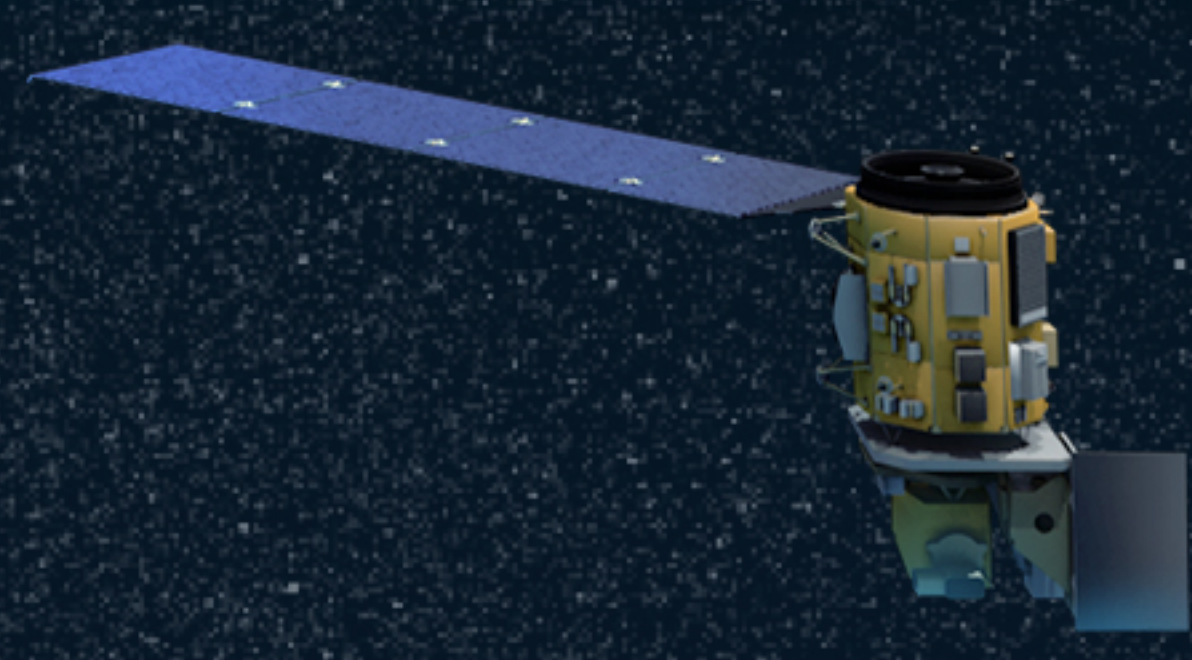

Satellite Missions

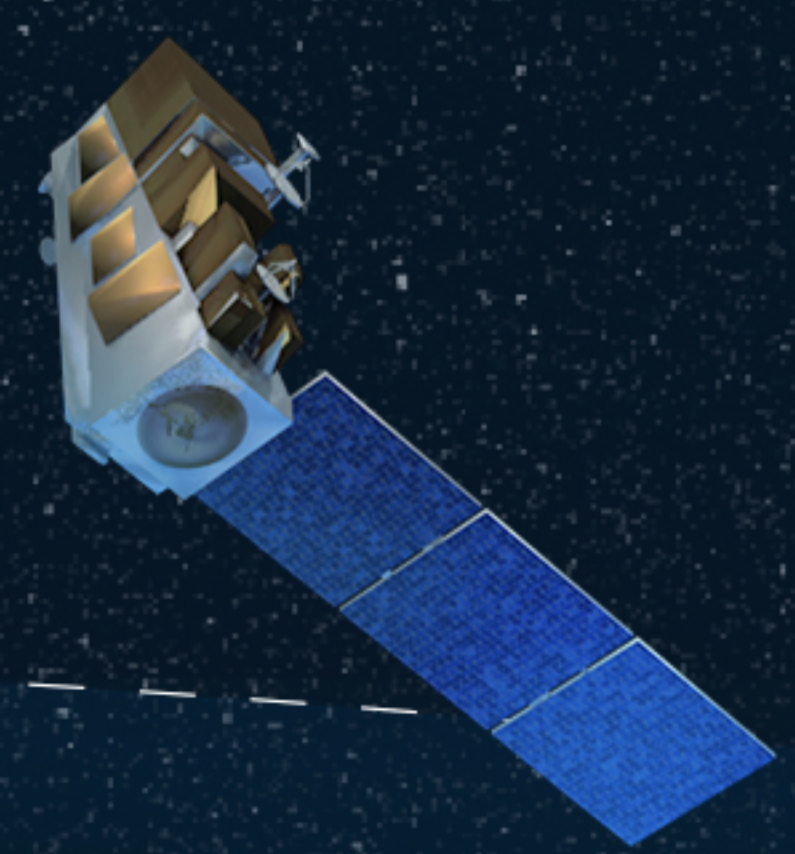

700 km

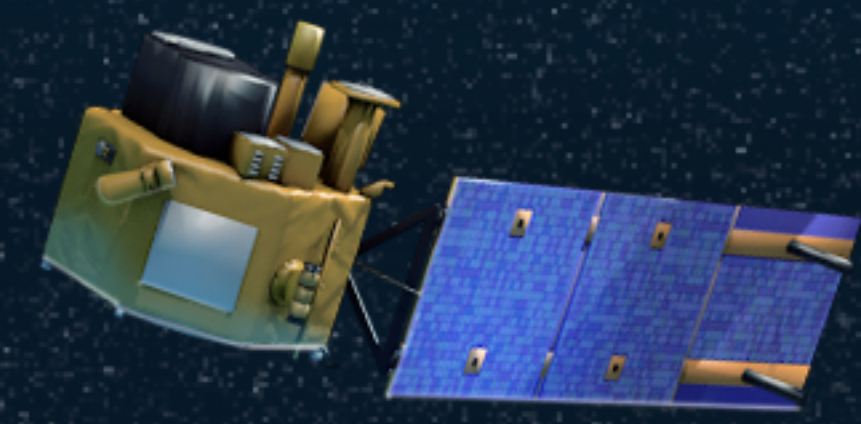

500 km

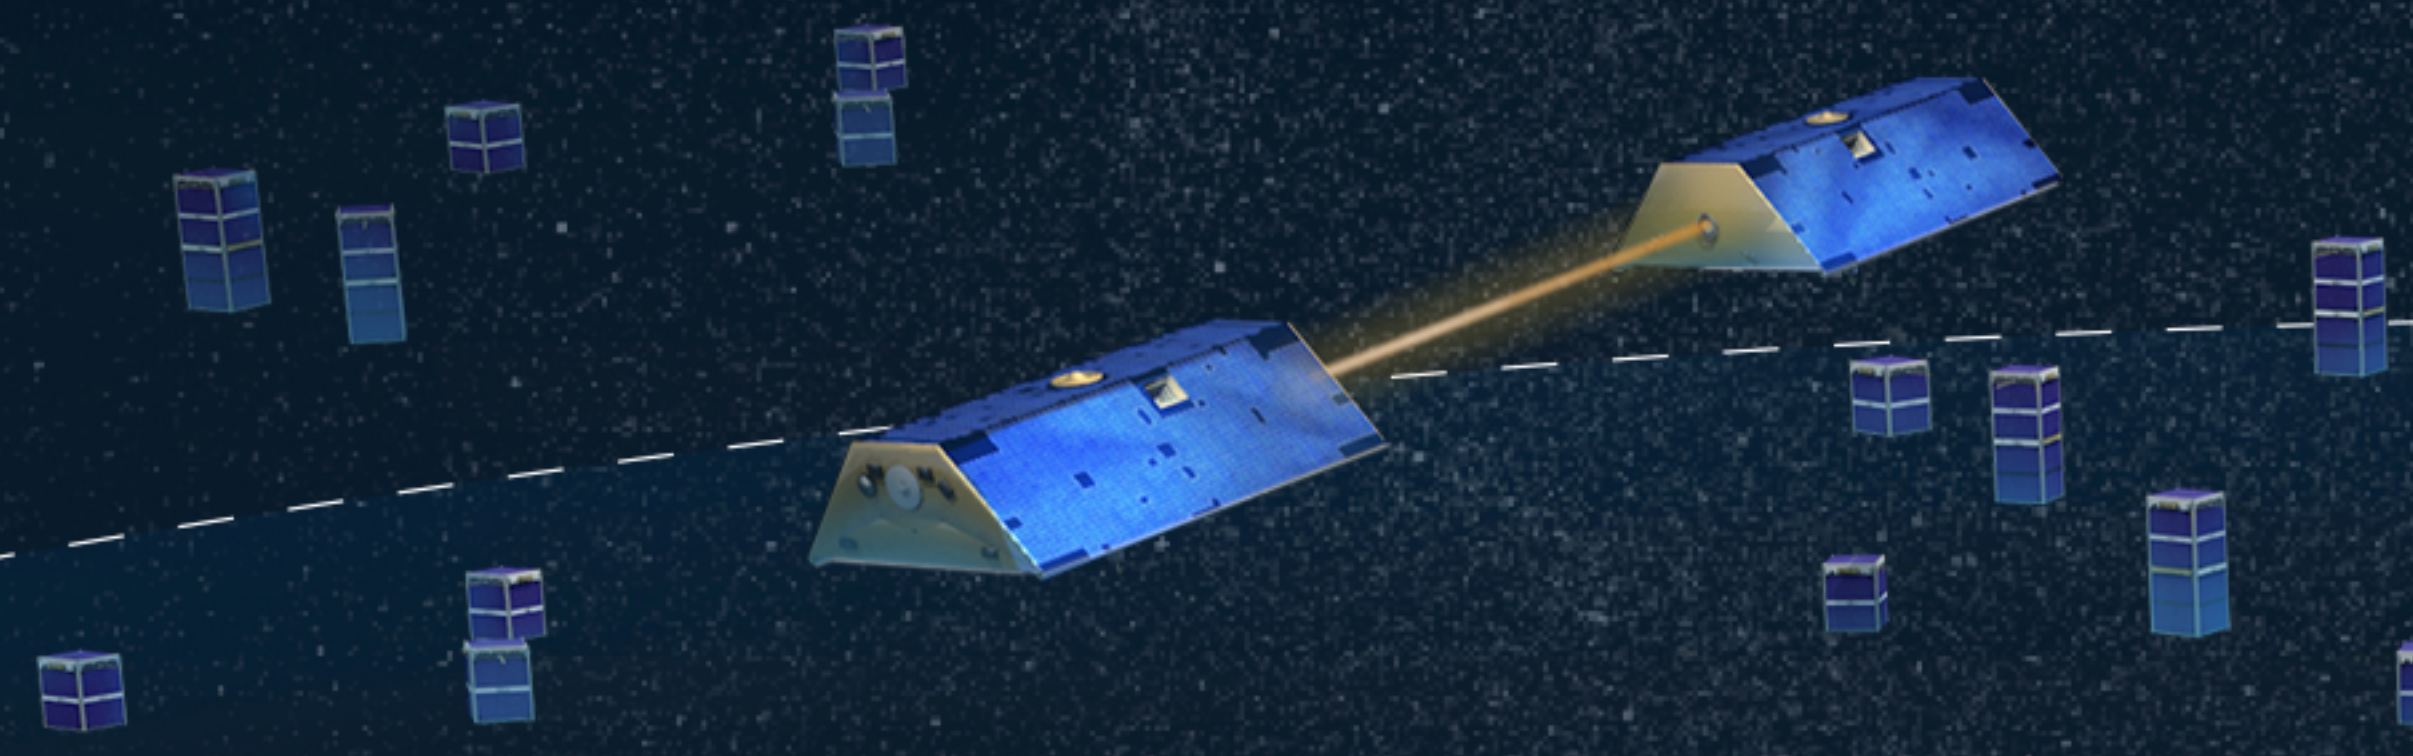

CubeSats  
and HD Video

Sensors aboard the ISS

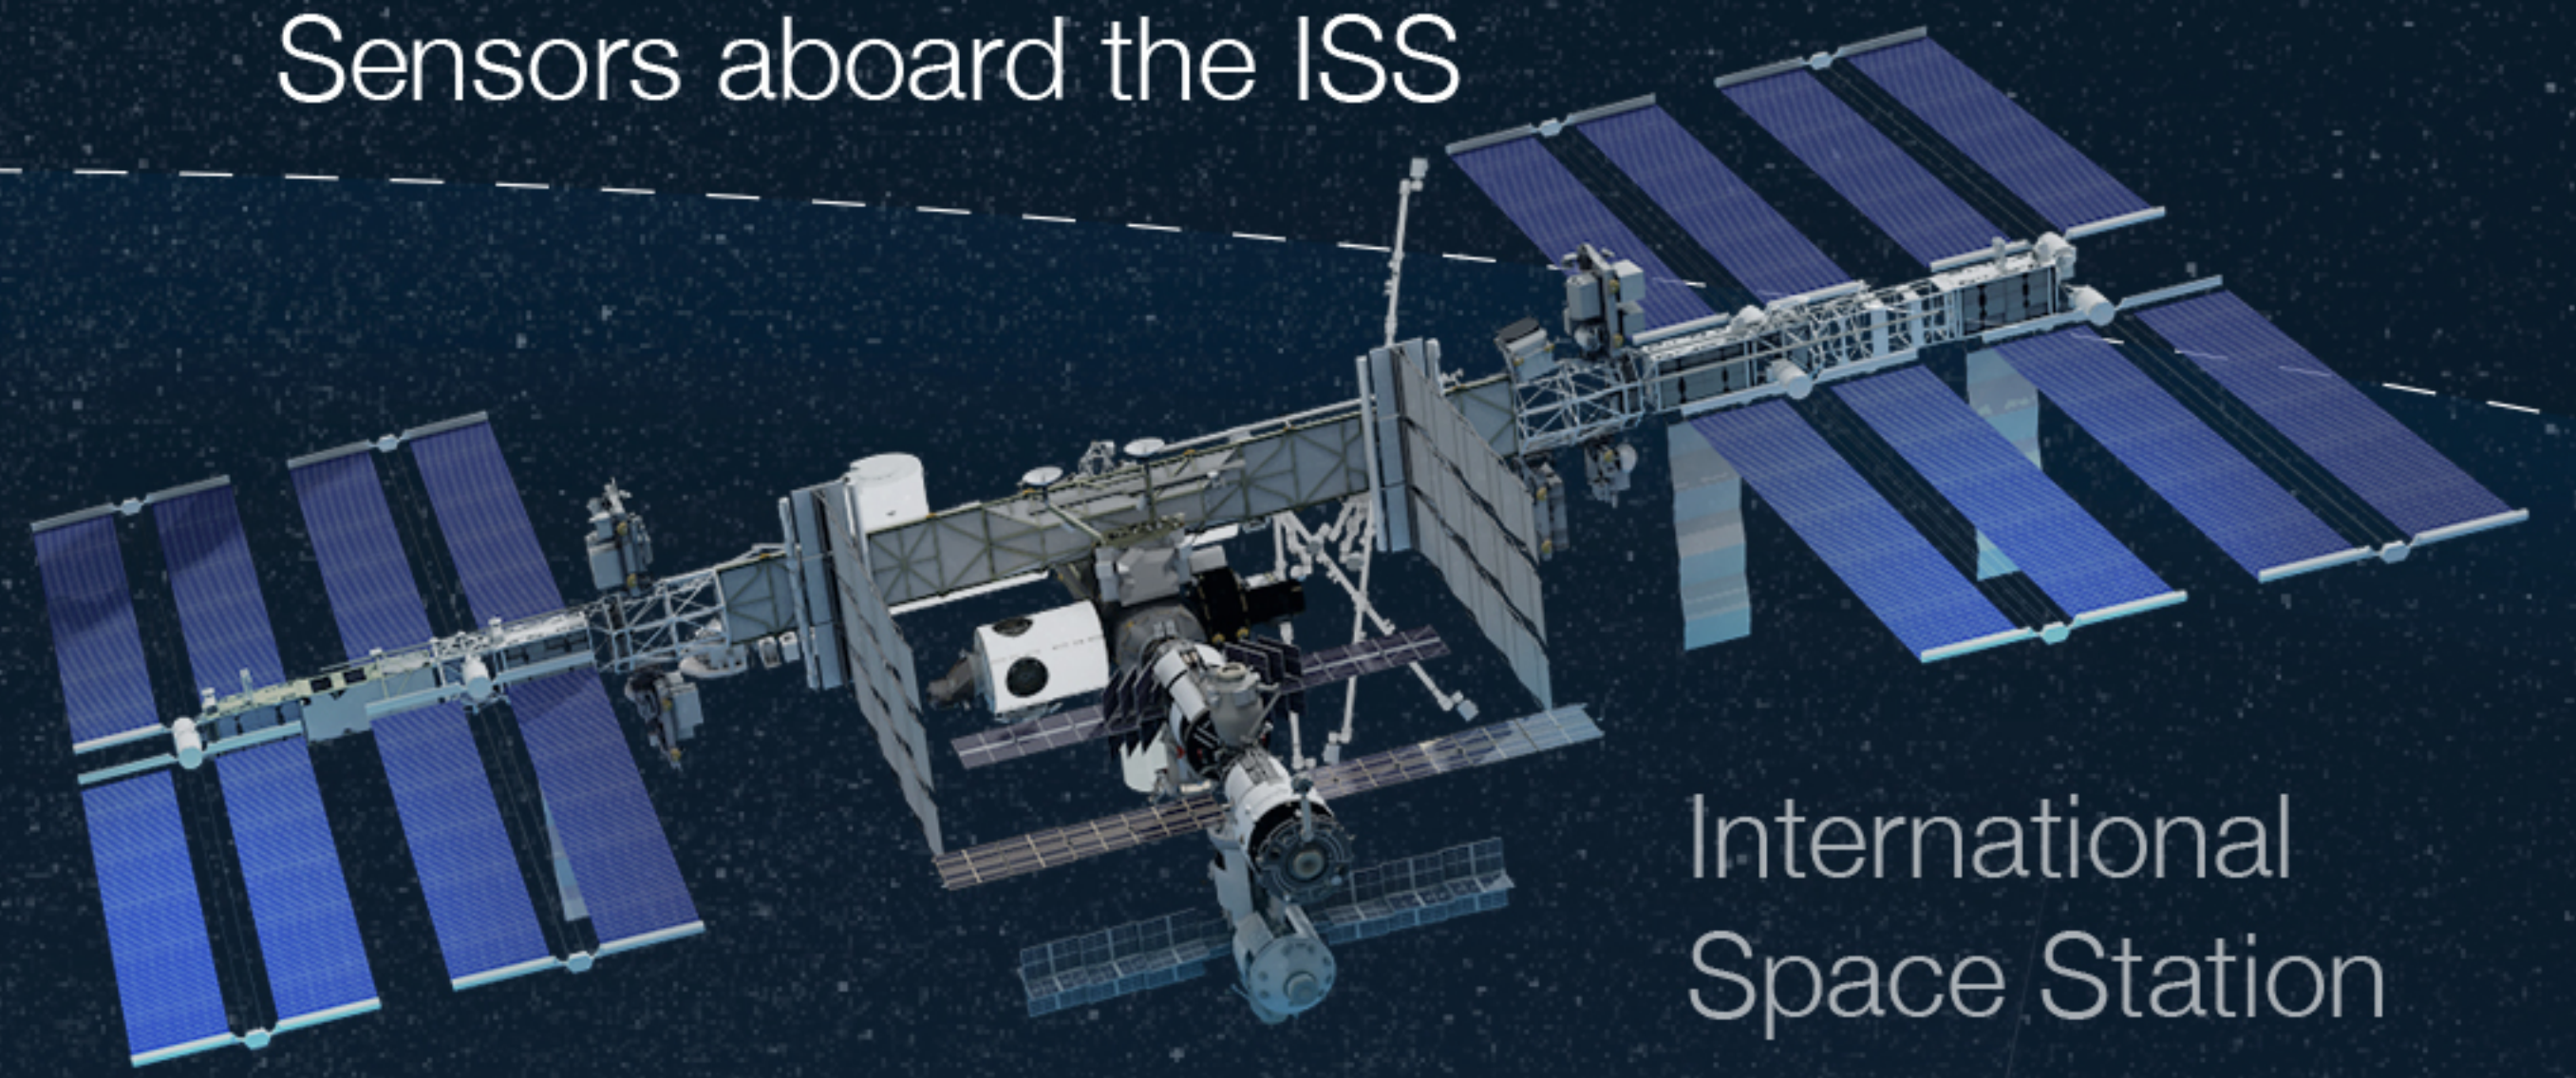

International  
Space Station

300 km

Research Balloons

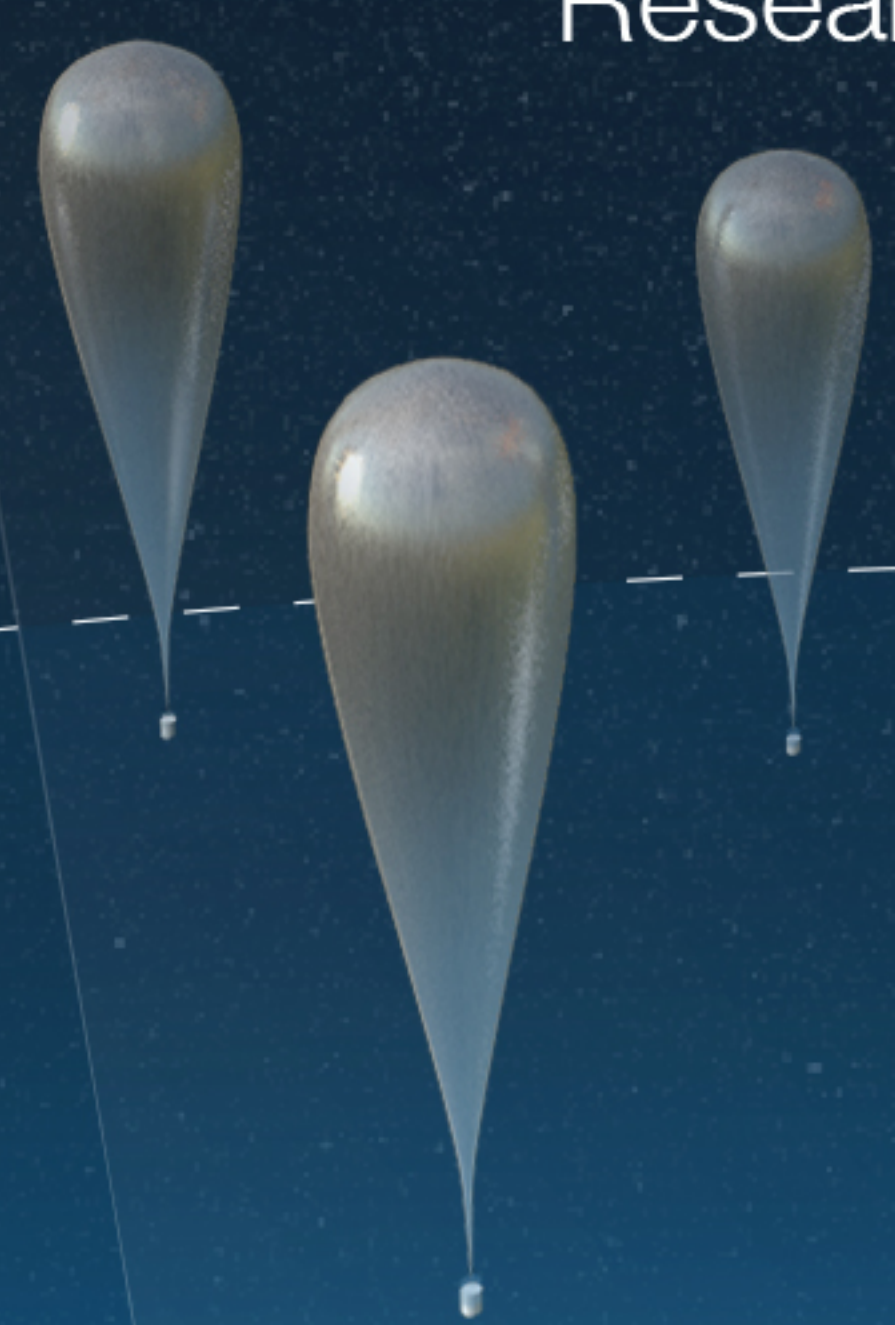

Solar Airplanes

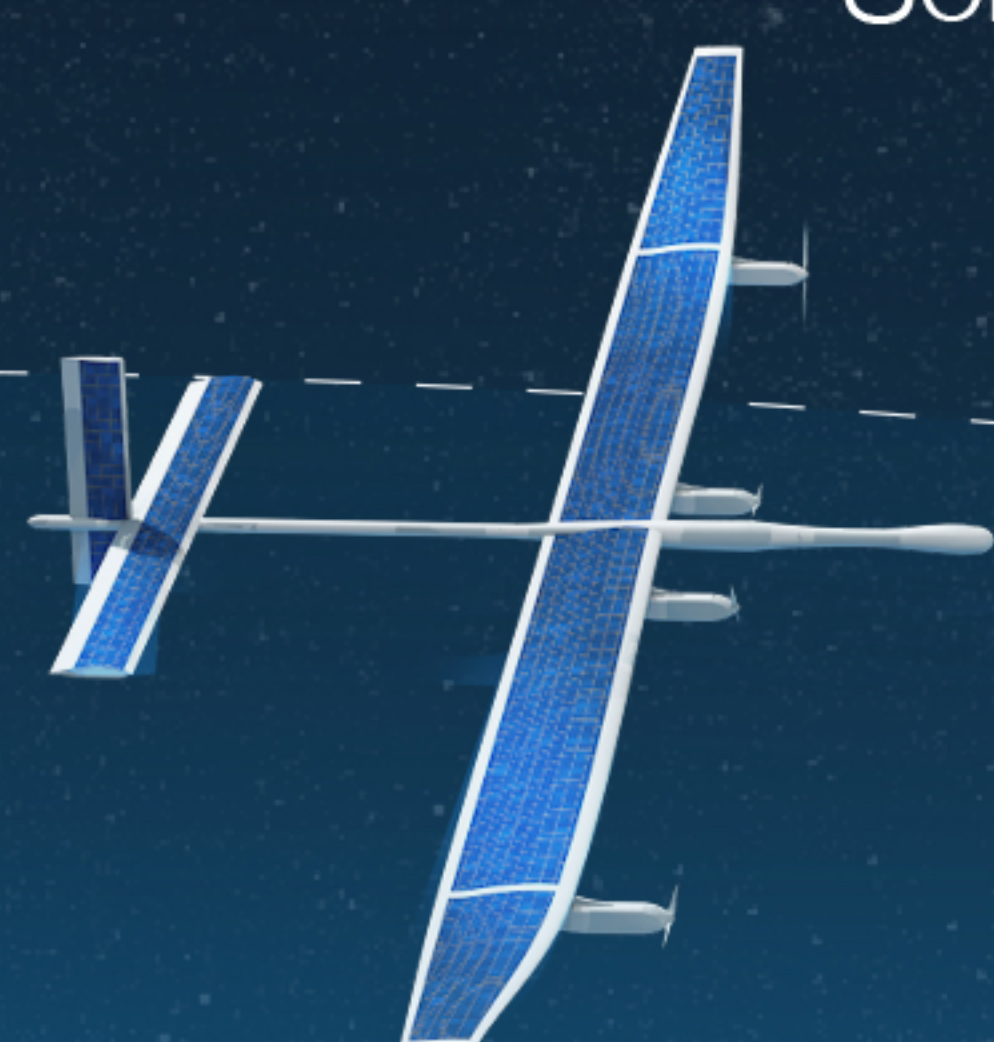

30 km

10 km

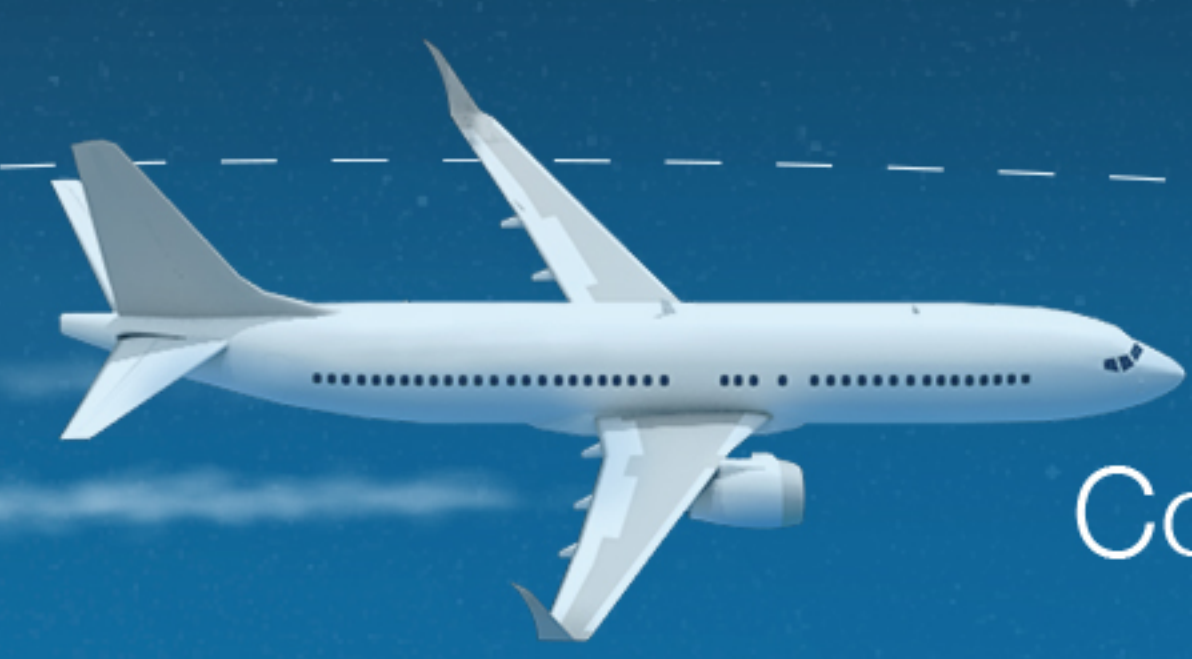

Commercial Airplanes

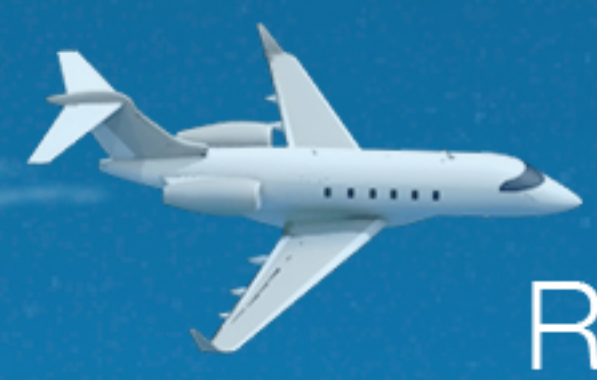

Research Airplanes

Opportunistic  
Sensing

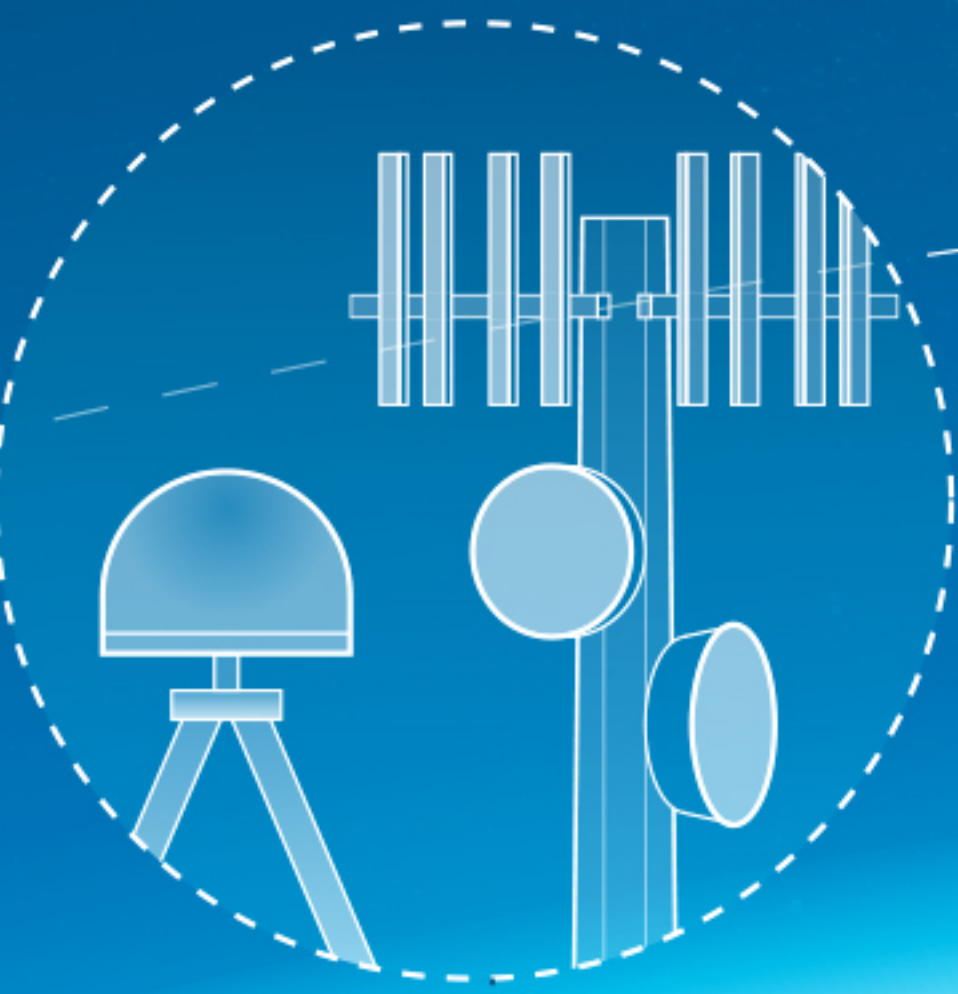

Citizen Science

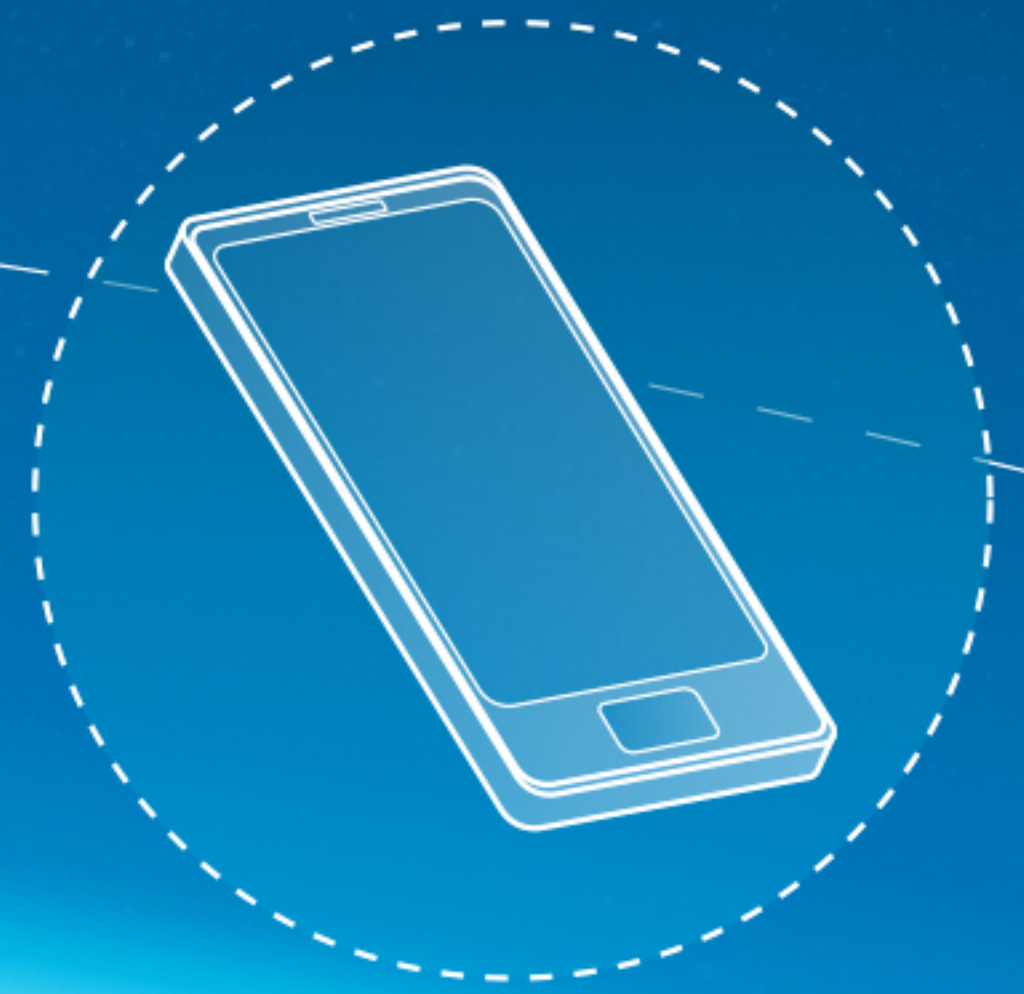

1 km

Doppler Radar

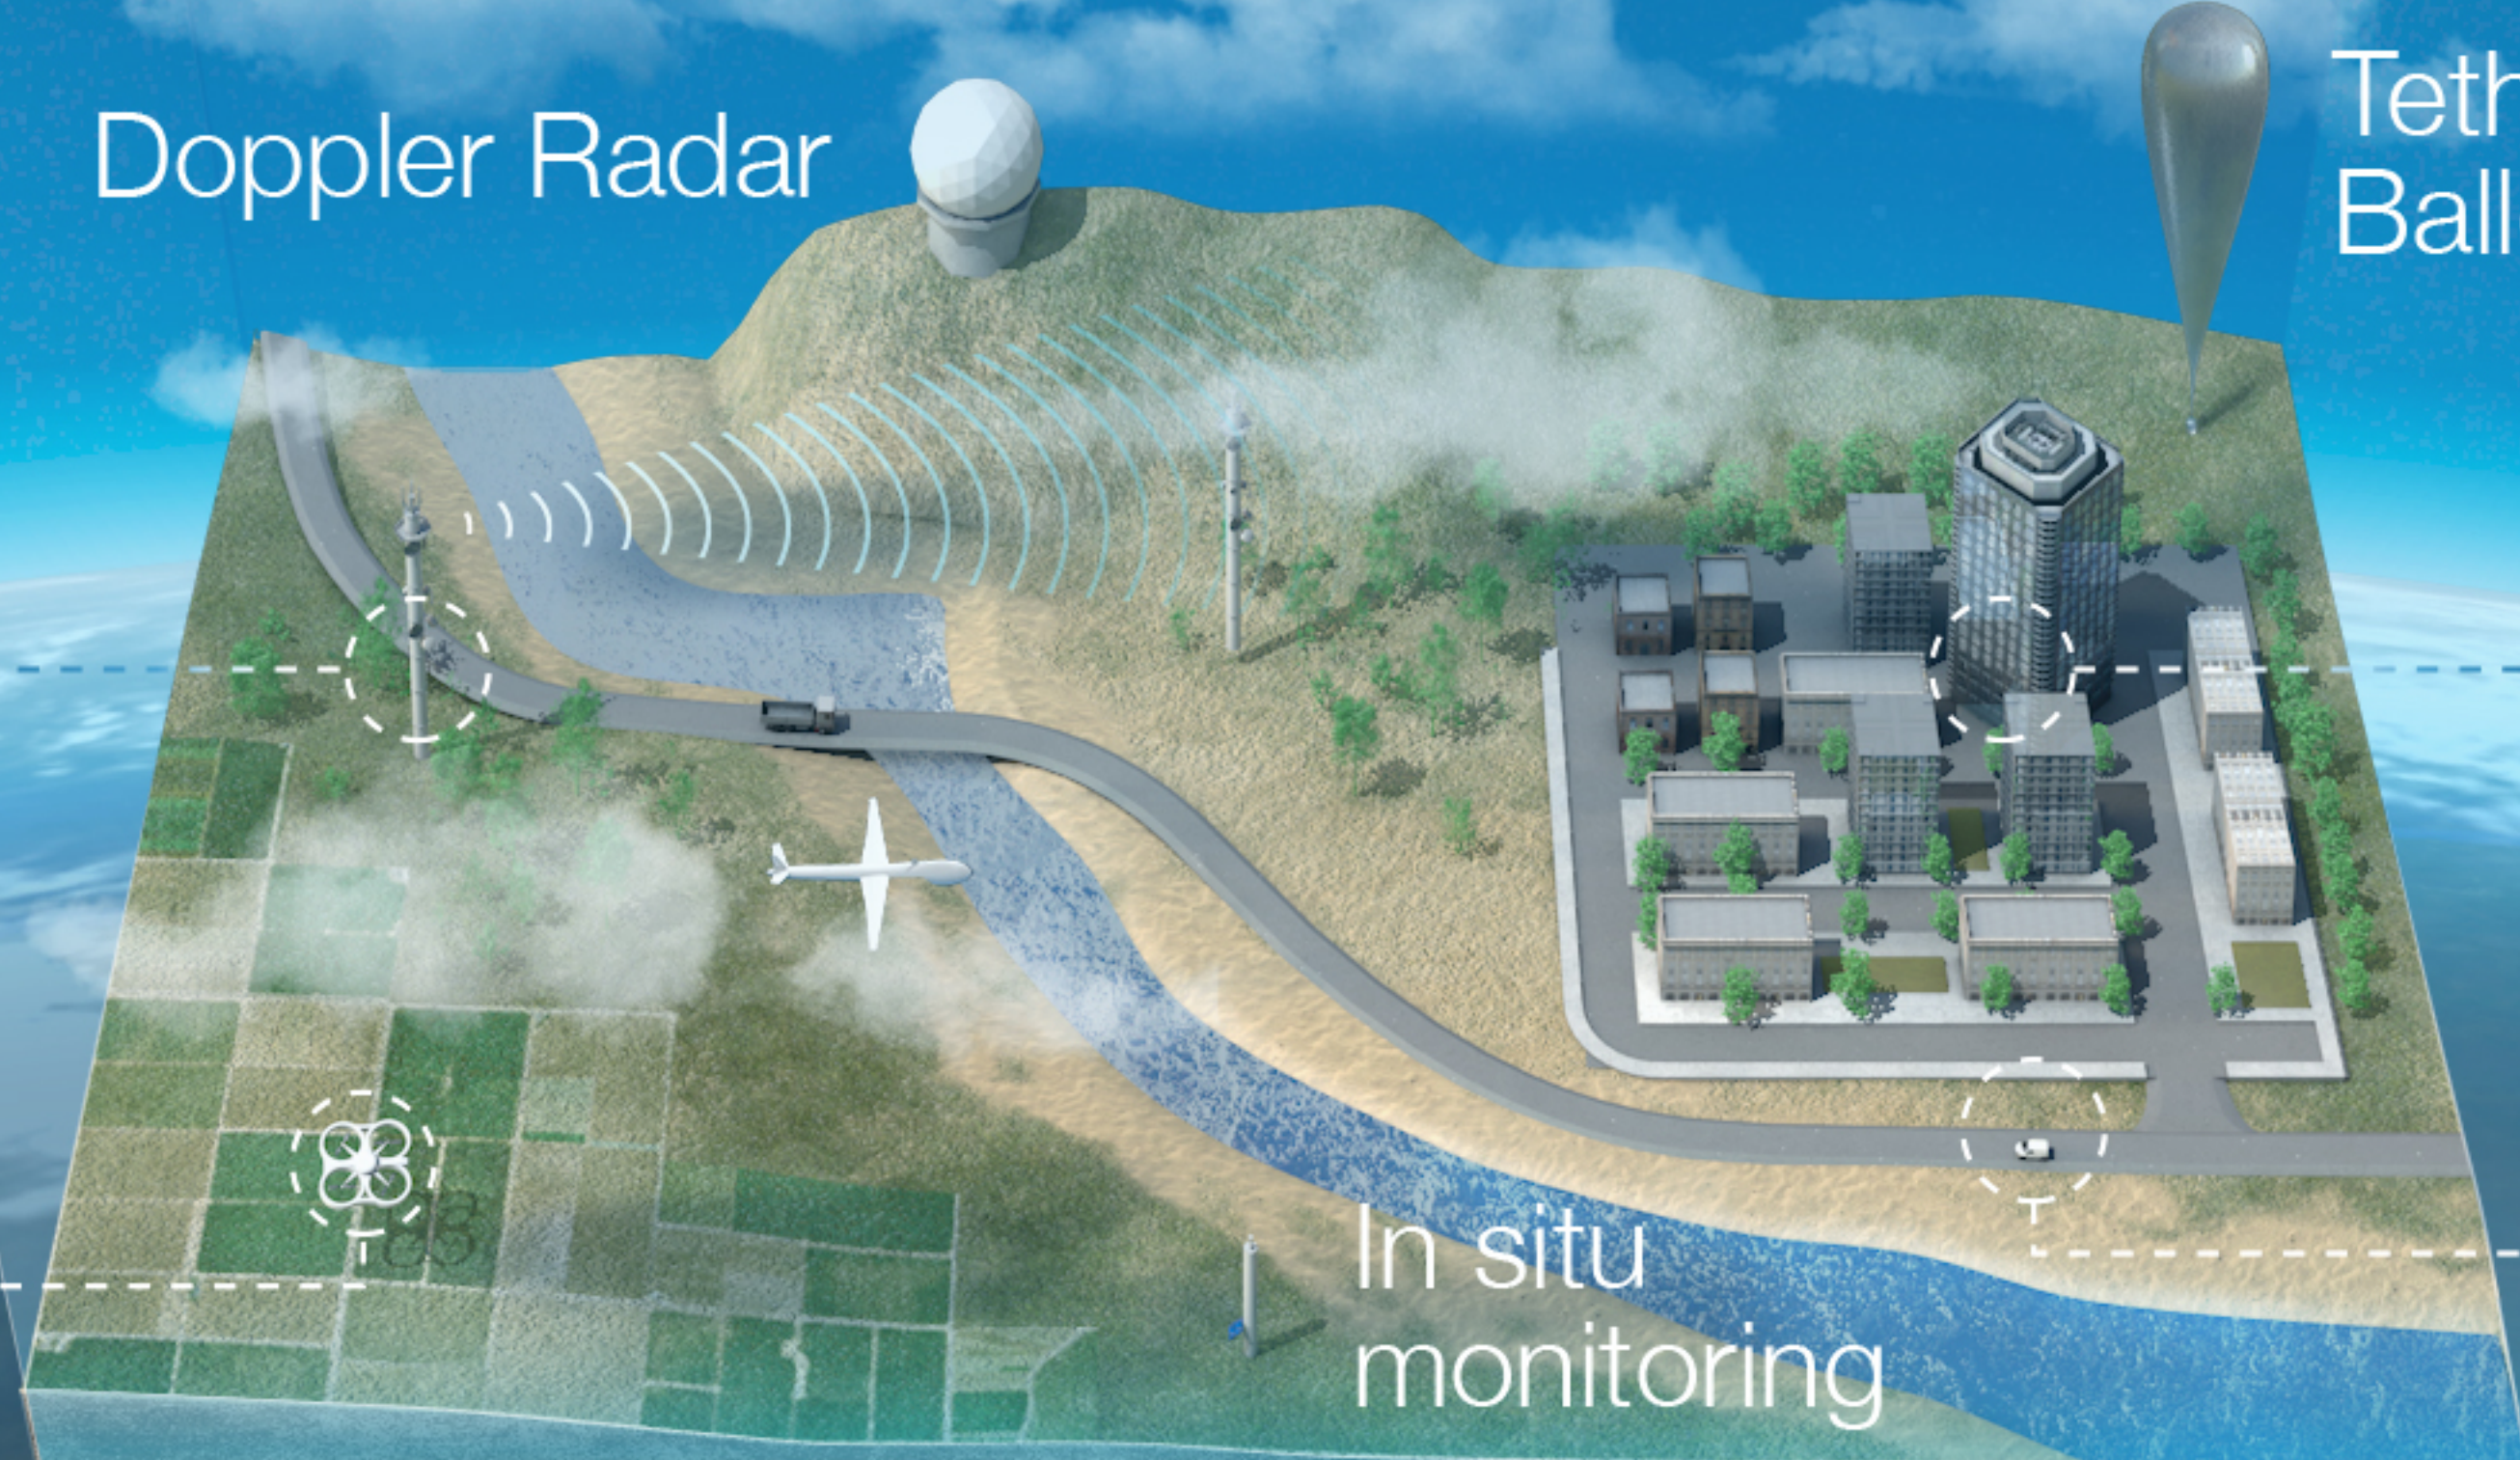

Tethered  
Balloon

Near Surface

UAVs

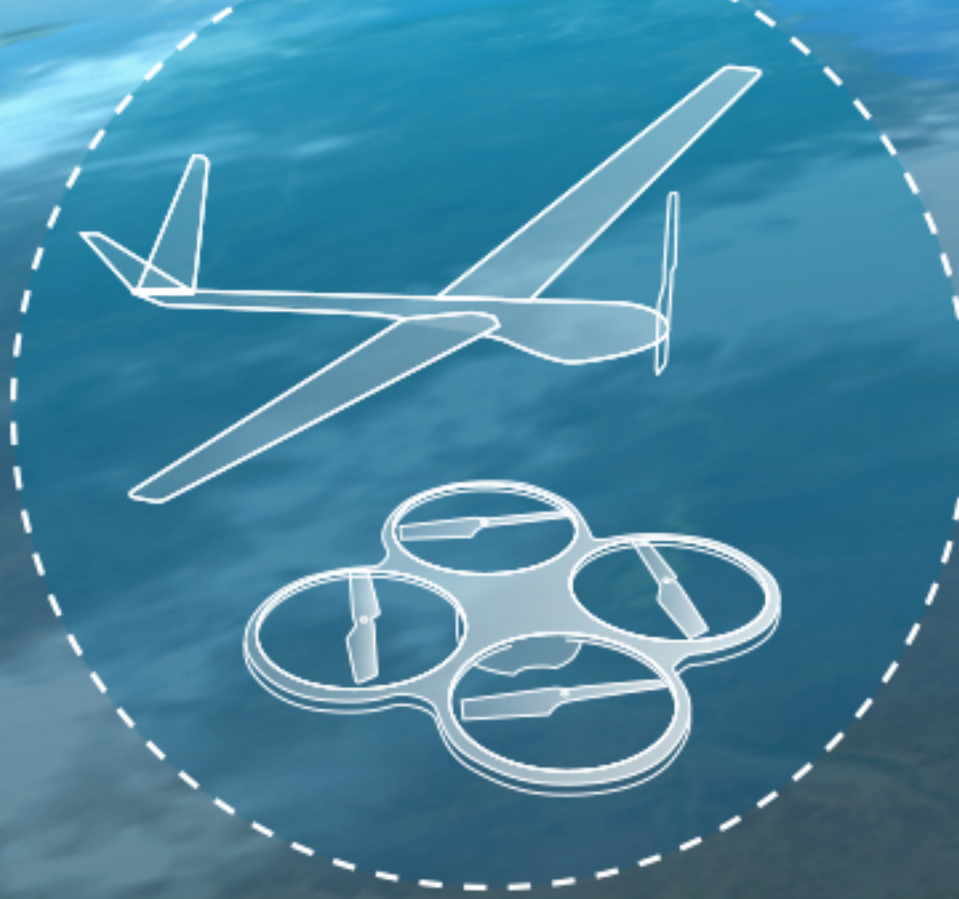

In situ  
monitoring

Instrumented  
Vehicles

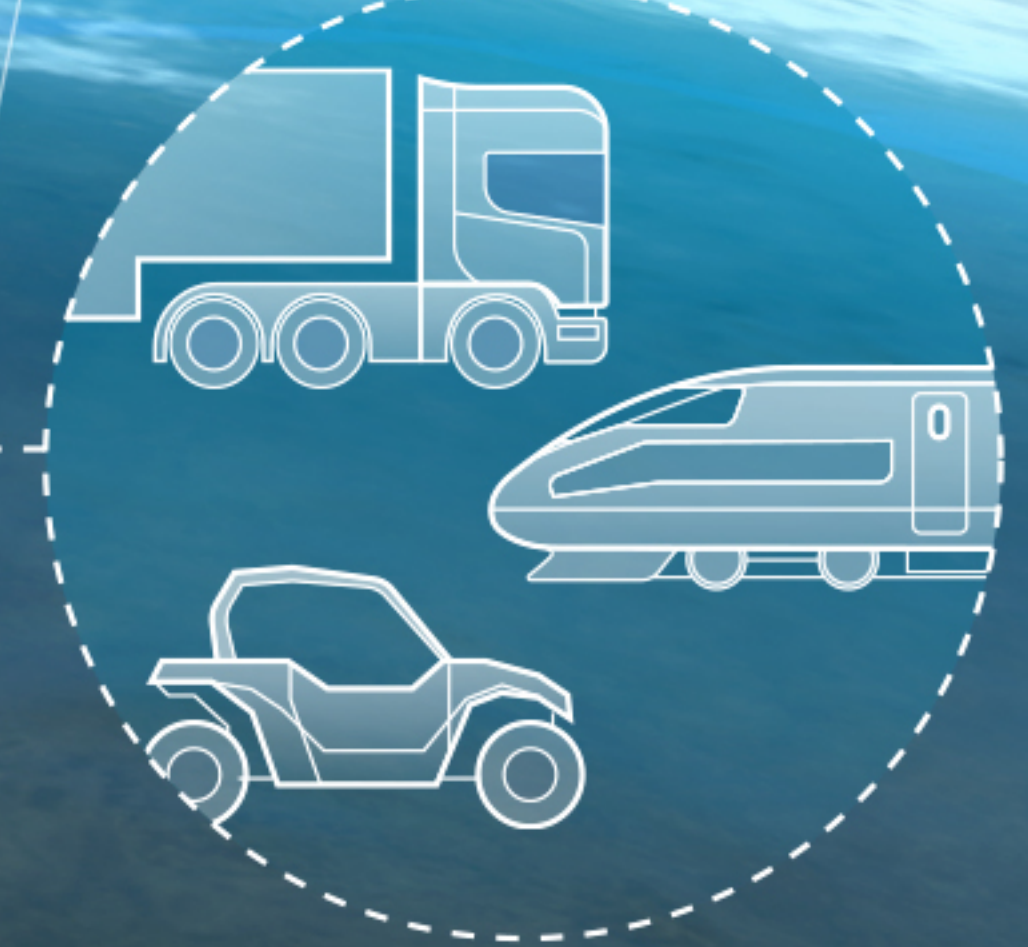

Supplement: Supplementary file [file hess-2017-54-AC1-supplement.pdf]
